# Supplementary material for: Expanding the footprint of the Storegga tsunami: New evidence from Arctic sediments
Source: Research Square preprint supplement (doi:10.21203/rs.3.rs-5551480/v1), 2024-12-10
Supplement: Supplementary file 1 [file bb22f78f6bc4097d36f9c2dc.pdf]

## Supplementary Figure 1

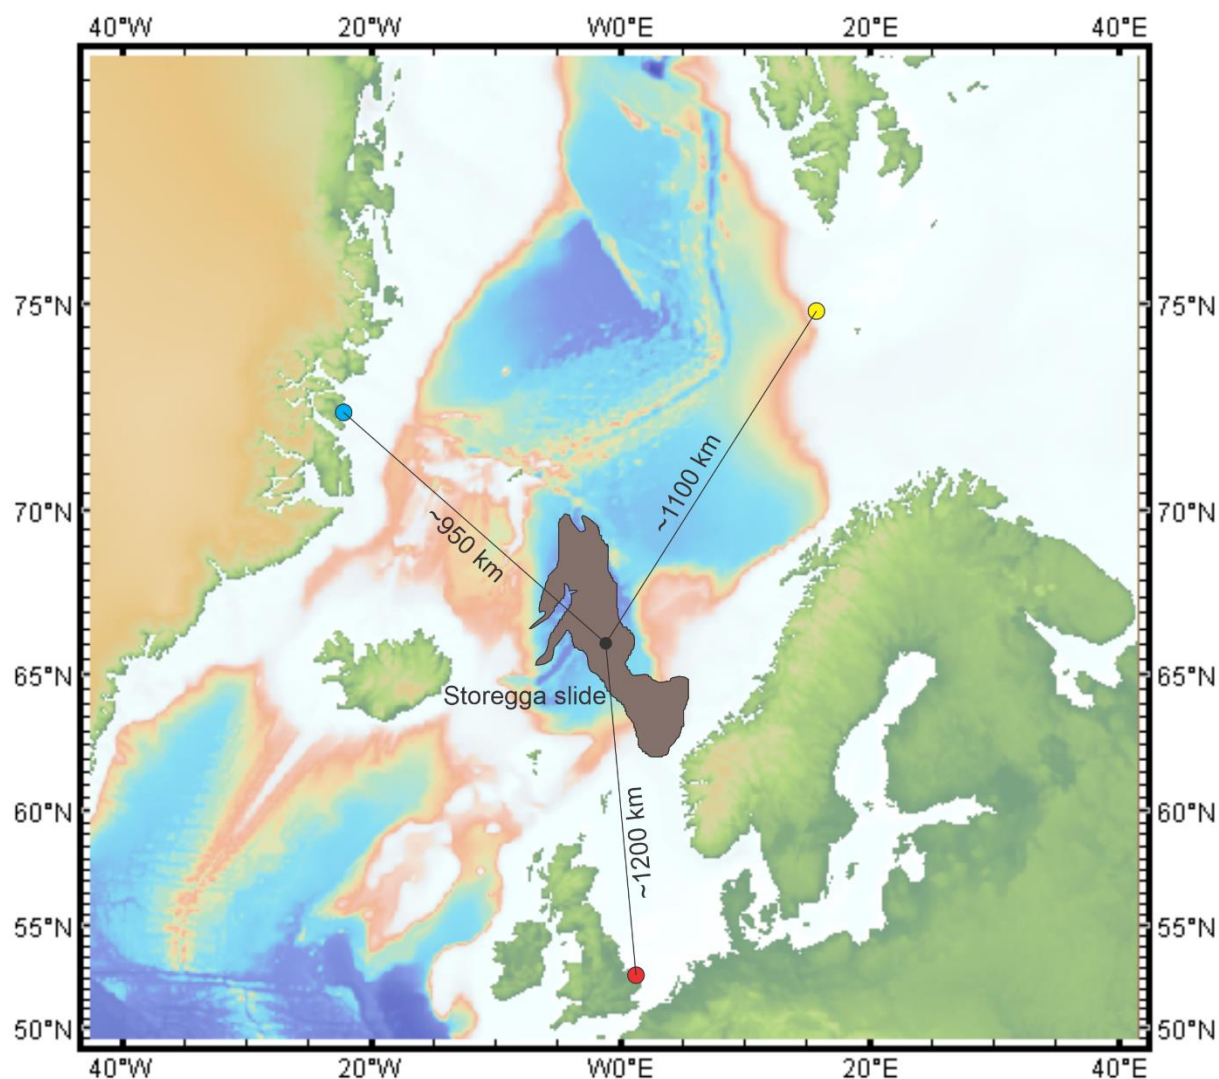

**Fig. 1| Bathymetry map<sup>1</sup> of the Nordic Seas, showing the distance between the longest previously observed tsunami deposits and the present study site.** The yellow dot represents the location of the current study (OCE22-KV02-GC). The red dot marks the location of a tsunami deposit from the southern North Sea, while the blue dots indicate tsunami deposits from East Greenland. Distances were calculated using *GeoMapApp* software (<http://www.geomapapp.org>).

## Reference

- 1 Ryan, W. B. *et al.* Global multi-resolution topography synthesis. **10** (2009).
